# Supplementary material for: Mechanism of Action of VP1-001 in cryAB(R120G)-Associated and Age-Related Cataracts
Source: PubMed Central journal article supplement — Invest Ophthalmol Vis Sci. 2019 Aug;60(10):3320–31. doi: 10.1167/iovs.18-25647 (PMC6676924; doi:10.1167/iovs.18-25647), 2019-08
Supplement: iovs-60-07-63_s01.pdf [file iovs-60-07-63_s01.pdf]

## 1 Supplemental methods

### 2 1. Synthesis of ent-VP1-001

#### 3 ent-Steroid 2

4 *ent*-Testosterone (**1**) was prepared as described previously (Covey, D.F., *Polish J.*  
5 *Chem.*, 2006, **80**, 511-522; see also references therein). To a solution of *ent*-  
6 testosterone (**1**, 3.8 g, 13.2 mmol) in acetic anhydride (80 mL) was added NaI (7.92 g,  
7 52 mmol) and trimethylsilyl chloride (5.8 mL, 52 mmol) at 0 °C under N<sub>2</sub>. After addition,  
8 the reaction was allowed to warm to room temperature for 2 h. The reaction was added  
9 to Et<sub>3</sub>N (40 mL) in diethyl ether (100 mL). The ether solution was washed with brine (50  
10 mL x 4), aqueous NaHCO<sub>3</sub> (50 mL x 2) and dried over Na<sub>2</sub>SO<sub>4</sub>. After filtration, the  
11 solvent was removed under reduced pressure and the residue was purified by flash  
12 column chromatography (silica gel eluted with 25% EtOAc in hexanes) to give *ent*-  
13 steroid **2** (3.05 g, 70%): <sup>1</sup>H NMR (400 MHz, CDCl<sub>3</sub>) δ 5.33-5.32 (m, 1H), 4.60 (t, *J* = 8.3  
14 Hz, 1H), 3.52-3.47 (m, 1H), 2.30-0.90 (m), 2.02 (s, 3H), 1.00 (s, 3H), 0.79 (s, 3H); <sup>13</sup>C  
15 NMR (100 MHz, CDCl<sub>3</sub>) δ 171.2, 140.9, 121.1, 82.7, 71.5, 51.0, 50.0, 42.3, 42.2, 37.2,  
16 36.7, 36.5, 31.6, 31.5, 31.4, 27.4, 23.5, 21.1, 20.5, 19.3, 11.8.

17

#### 18 ent-Steroid 3

19

20 *ent*-Steroid **2** (3.05 g, 4.04 mmol) was dissolved in CH<sub>2</sub>Cl<sub>2</sub> (50 mL) and cooled to 0 °C.  
21 (*i*-Pr)<sub>2</sub>EtN (3.0 mL) and ClCH<sub>2</sub>OMe (1.35 ml, 18.0 mmol) were added and the reaction  
22 was stirred at room temperature for 16 h. The reaction was made basic by adding  
23 aqueous NaHCO<sub>3</sub> solution and the product was extracted into CH<sub>2</sub>Cl<sub>2</sub>. The combined

24 extracts were washed with brine, dried over Na<sub>2</sub>SO<sub>4</sub>, filtered and solvent removed to  
25 give a viscous liquid which was purified by flash column chromatography (silica gel  
26 eluted with 10% EtOAc in hexanes) to give *ent*-steroid **3** as a colorless liquid (2.65 g,  
27 77%): <sup>1</sup>H NMR (400 MHz, CDCl<sub>3</sub>) δ 5.33-5.32 (m, 1H), 4.65 (s, 2H), 4.59 (t, *J* = 8.2 Hz,  
28 1H), 3.39-3.35 (m, 1H), 3.34 (s, 3H), 2.35-0.89 (m), 2.01 (s, 3H), 0.99 (s, 3H), 0.78 (s,  
29 3H); <sup>13</sup>C NMR (100 MHz, CDCl<sub>3</sub>) δ 171.0, 140.7, 121.2, 94.6, 82.6, 76.7, 55.0, 50.9,  
30 50.0, 42.3, 39.4, 37.1, 36.7, 31.6, 31.4, 28.8, 27.4, 23.5, 21.0, 20.4, 19.3, 11.8.

31

### 32 ***ent*-Steroid 4**

33

34 To a solution of *ent*-steroid **3** (2.65 g, 7.05 mmol) in methanol (60 mL) was added  
35 K<sub>2</sub>CO<sub>3</sub> (4.0 g) at room temperature. The mixture was refluxed for 16 h. Methanol was  
36 removed under reduced pressure and the residue was purified by flash column  
37 chromatography (silica gel eluted with 25% EtOAc in hexanes) to give *ent*-steroid **4**  
38 (2.31 g, 99%): <sup>1</sup>H NMR (400 MHz, CDCl<sub>3</sub>) δ 5.32-5.30 (m, 1H), 4.64 (s, 2H), 3.61 (t, *J* =  
39 8.6 Hz, 1H), 3.40-3.34 (m, 1H), 3.33 (s, 3H), 2.31-0.87 (m), 0.95 (s, 3H), 0.72 (s, 3H);  
40 <sup>13</sup>C NMR (100 MHz, CDCl<sub>3</sub>) δ 140.7, 121.3, 94.5, 81.6, 76.7, 55.0, 51.2, 50.2, 42.6,  
41 39.4, 37.2, 36.7, 36.5, 31.8, 31.4, 30.3, 28.8, 23.3, 20.5, 19.3, 10.9.

42

### 43 ***ent*-Steroid 5**

44

45 To a solution of *ent*-steroid **4** (1.5 g, 4.54 mmol) in CH<sub>2</sub>Cl<sub>2</sub> (60 mL) was added Dess-  
46 Martin periodinane (2.5 g, 6 mmol) at room temperature. After 1 h, water (50 mL) was

47 added, the product was extracted into CH<sub>2</sub>Cl<sub>2</sub> (150 mL x 3) and the combined extracts  
48 were washed with brine (50 mL x 2). The organic layer was dried over Na<sub>2</sub>SO<sub>4</sub>, filtered,  
49 and the solvents removed. The residue was purified by flash column chromatography  
50 (silica gel eluted with 10% EtOAc in hexanes) to give *ent*-steroid **5** (1.5 g, 100%): <sup>1</sup>H  
51 NMR (400 MHz, CDCl<sub>3</sub>) δ 5.39-5.38 (m, 1H), 4.68 (s, 2H), 3.45-3.38 (m, 1H), 3.37 (s,  
52 3H), 2.49-0.98 (m), 1.03 (s, 3H), 0.88 (s, 3H); <sup>13</sup>C NMR (100 MHz, CDCl<sub>3</sub>) δ 221.0,  
53 140.9, 120.9, 94.7, 76.7, 55.1, 51.7, 50.2, 47.5, 39.5, 37.1, 36.8, 35.8, 31.4, 31.3, 30.8,  
54 28.8, 21.8, 20.3, 19.3, 13.5.

55

#### 56 ***ent*-Steroid 6**

57

58 A solution of freshly prepared sodium ethoxide (sodium 0.4 g, 15 mmol dissolved in  
59 ethanol 15 mL) was added dropwise slowly to a solution of *ent*-steroid **5** (1.5 g, 4.54  
60 mmol) and triethyl phosphonoacetate (3.44 g, 15 mmol) in anhydrous ethanol (25 mL)  
61 under N<sub>2</sub> while stirring at 35-40 °C. After addition, the reaction was refluxed for 16 h.  
62 After cooling to room temperature, the ethanol was removed and the residue was  
63 dissolved in ether which was washed with water, dried over Na<sub>2</sub>SO<sub>4</sub> and filtered.  
64 Solvent was removed and the residue was purified by flash column chromatography  
65 (silica gel eluted with 10% EtOAc in hexanes) to give *ent*-steroid **6** (1.68 g, 87%): <sup>1</sup>H  
66 NMR (400 MHz, CDCl<sub>3</sub>) δ 5.52 (s, 1H), 5.35-5.34 (m, 1H), 4.66 (s, 2H), 4.15-4.09 (m,  
67 2H), 3.43-3.33 (m, 1H), 3.35 (s, 3H), 2.84-2.79 (m, 2H), 2.36-0.93 (m), 1.01 (s, 3H),  
68 0.82 (s, 3H); <sup>13</sup>C NMR (100 MHz, CDCl<sub>3</sub>) δ 176.1, 167.3, 140.7, 121.3, 108.6, 94.6,

69 76.7, 59.4, 55.1, 53.7, 50.2, 46.0, 39.5, 37.2, 36.8, 35.1, 31.6, 31.5, 30.4, 28.8, 24.4,  
70 20.9, 19.3, 18.2, 14.3.

71

72 The reaction sequence reported below that converts *ent*-steroid **6** into *ent*-steroid **16**  
73 (***ent*-VP1-001**) is based on that reported previously for the preparation of the natural  
74 stereoisomer of *ent*-steroid **16** (Wicha, J.; Bal, K. *J. C. S. Perkin I*, **1978**, 1282-1288).

75

#### 76 **Unpurified *ent*-Steroid 7**

77

78 To a solution of *ent*-steroid **6** (1.4 g, 3.48 mmol) in EtOAc (150 mL) was added PtO<sub>2</sub> (15  
79 mg) at room temperature. Hydrogenation was carried out under 20 psi for 6 h. Solvent  
80 was removed and the residue was purified by flash column chromatography (silica gel  
81 eluted with 10% EtOAc in hexanes) to give unpurified *ent*-steroid **7** (1.4 g, 100%): <sup>1</sup>H  
82 NMR δ 4.63-4.60 (m, 1H), 4.08-4.03 (m, 2H), 3.48-3.32 (m, 1H), 3.31 (s, 3H), 2.34-0.57  
83 (m), 0.76 (s, 3H), 0.54 (s, 3H); <sup>13</sup>C NMR δ 176.1, 140.7, 121.3, 94.4, 76.2, 60.0, 55.3,  
84 55.0, 54.5, 46.9, 44.9, 42.1, 37.4, 37.0, 35.6, 35.5, 35.3, 35.2, 32.1, 28.7, 28.1, 24.4,  
85 20.9, 14.2, 12.5.

86

87 Unpurified *ent*-steroid **7** contains minor amounts of the *ent*-steroid in which the Δ<sup>5</sup>  
88 double bond has been hydrogenated. This saturated *ent*-steroid could not be removed  
89 easily by chromatography on silica gel. To separate the two compounds  
90 chromatographically, *ent*-steroid **7** was converted first into *ent*-steroid **8** and then into

91 *ent*-steroid **9** which is easily purified. *ent*-Steroid **9** was then converted back via *ent*-  
92 steroid **8** into *ent*-steroid **7** and then subsequently into *ent*-steroid **10**.

93

#### 94 **Unpurified *ent*-Steroid 8**

95

96 Acetyl chloride (2 mL) was slowly added to unpurified hydrogenation product *ent*-steroid  
97 **7** (1.4 g, 3.48 mmol) in ethanol (30 mL) at room temperature. After 2 h, water was  
98 added and the product was extracted into CH<sub>2</sub>Cl<sub>2</sub> (100 mL x 2). The combined extracts  
99 were dried over Na<sub>2</sub>SO<sub>4</sub>, filtered and the solvent was removed under reduced pressure.  
100 The residue was purified by flash column chromatography (silica gel eluted with 25%  
101 EtOAc in hexanes) to give unpurified *ent*-steroid **8** (1.2 g): <sup>1</sup>H NMR (400 MHz, CDCl<sub>3</sub>) δ  
102 5.35-5.34 (m, 1H), 4.13-4.07 (m, 2H), 3.55-3.47 (m, 1H), 2.38-0.81 (m), 1.10 (s, 3H),  
103 0.61 (s, 3H); <sup>13</sup>C NMR (100 MHz, CDCl<sub>3</sub>) δ 173.9, 140.8, 121.5, 71.6, 60.1, 55.5, 50.3,  
104 46.8, 42.2, 41.9, 37.3, 37.2, 36.5, 35.2, 31.9, 31.8, 31.6, 28.1, 24.5, 20.8, 19.4, 14.2,  
105 12.4.

106

#### 107 ***ent*-Steroid 9**

108

109 To a solution of unpurified *ent*-steroid **8** (1.2 g, 3.33 mmol) in diethyl ether (100 mL) and  
110 acetic acid (5 mL) was slowly added Br<sub>2</sub> in HOAc (3 mL) until a brown color persisted.  
111 After 5 min, aqueous Na<sub>2</sub>S<sub>2</sub>O<sub>3</sub> was added and the reaction became colorless. EtOAc  
112 (100 mL) was added and the EtOAc solution was washed with aqueous NaHCO<sub>3</sub> (50  
113 mL x 2), brine (50 mL) and dried over anhydrous Na<sub>2</sub>SO<sub>4</sub>. After filtration, the solvent

114 was removed under reduced pressure and the residue was purified by flash column  
115 chromatography (silica gel eluted with 20% EtOAc in hexanes) to give *ent*-steroid **9** (1.4  
116 g, 81%): <sup>1</sup>H NMR (400 MHz, CDCl<sub>3</sub>) δ 4.82-4.81 (m, 1H), 4.44-4.37 (m, 1H), 4.12-4.06  
117 (m, 2H), 2.72-1.08 (m), 1.43 (s, 3H), 0.62 (s, 3H); <sup>13</sup>C NMR (100 MHz, CDCl<sub>3</sub>) δ 173.8,  
118 89.6, 68.9, 60.1, 56.0, 54.0, 47.6, 46.6, 45.6, 42.2, 42.0, 37.2, 37.0, 36.7, 35.2, 30.9,  
119 30.1, 28.0, 24.2, 21.0, 20.3, 14.2, 12.7.

120

### 121 **Purified *ent*-Steroid 8**

122

123 Zinc dust (6.0 g) was added to a solution of *ent*-steroid **9** (1.4 g, 2.7 mmol) in HOAc (20  
124 mL) and EtOAc (30 mL) at room temperature. After 16 h, the mixture was filtered  
125 through Celite and washed with EtOAc (200 mL). Solvent was removed under reduced  
126 pressure and the residue was purified by flash column chromatography (silica gel eluted  
127 with 25% EtOAc in hexanes) to give purified *ent*-steroid **8** (925 mg, 95%): <sup>1</sup>H NMR (400  
128 MHz, CDCl<sub>3</sub>) δ 5.26-5.25 (m, 1H), 4.06-4.01 (m, 2H), 3.85 (s, br, 1H), 3.47-3.40 (m, 1H),  
129 2.31-0.73 (m), 0.93 (s, 3H), 0.54 (s, 3H); <sup>13</sup>C NMR (100 MHz, CDCl<sub>3</sub>) δ 173.8, 140.7,  
130 121.1, 71.2, 60.0, 55.4, 50.1, 46.6, 41.9, 41.7, 37.1, 37.0, 36.3, 35.0, 31.7, 31.7, 31.2,  
131 27.9, 24.3, 20.6, 19.2, 14.0, 12.2.

132

### 133 **Purified *ent*-Steroid 7**

134

135 Purified *ent*-steroid **8** (925 mg, 2.57 mmol) was dissolved in CH<sub>2</sub>Cl<sub>2</sub> (20 mL) and cooled  
136 to 0 °C. (*i*-Pr)<sub>2</sub>EtN (1.3 mL, 7.5 mmol) and ClCH<sub>2</sub>OMe (0.45 mL, 6.0 mmol) were added

137 and the reaction was stirred at room temperature for 16 h. The reaction mixture was  
138 made basic by adding aqueous saturated NaHCO<sub>3</sub> solution and the product extracted  
139 into CH<sub>2</sub>Cl<sub>2</sub>. The combined extracts were washed with brine, dried over anhydrous  
140 Na<sub>2</sub>SO<sub>4</sub> and solvent removed to give a viscous liquid which was purified by flash column  
141 chromatography (silica gel eluted with 20% EtOAc in hexanes) to give purified *ent*-  
142 steroid **7** as a colorless liquid (1.02 g, 98%): <sup>1</sup>H NMR (400 MHz, CDCl<sub>3</sub>) δ 5.34-5.33 (m,  
143 1H), 4.67 (s, 2H), 4.12 (q, *J* = 7.0 Hz, 2H), 3.42-3.36 (m, 1H), 3.35 (s, 3H), 2.37-0.80  
144 (m), 1.00 (s, 3H), 0.60 (s, 3H); <sup>13</sup>C NMR (CDCl<sub>3</sub>) δ 173.8, 140.7, 121.5, 94.6, 76.8, 60.0,  
145 55.5, 55.1, 50.3, 46.7, 41.9, 39.5, 37.2, 37.1, 36.7, 35.2, 31.9, 31.8, 28.9, 28.1, 24.5,  
146 20.7, 19.3, 14.2, 12.3.

147

**148 ent-Steroid 10**

149

150 To a solution of *ent*-steroid **7** (500 mg, 1.25 mmol) in THF (20 mL) was added LDA  
151 (1.25 mL, 2.0 M, 2.5 mmol) and HMPA (0.5 mL) at -78 °C. After 1 h, 2-(3-iodopropyl)-2-  
152 methyl-1,3-dioxolane (960 mg, 3.75 mmol) was added. After addition, the mixture was  
153 warmed to room temperature for 16 h. Aqueous NH<sub>4</sub>Cl was added and the product was  
154 extracted into EtOAc (100 mL x 2), dried over Na<sub>2</sub>SO<sub>4</sub> and filtered. Solvent was  
155 removed under reduced pressure and the residue was purified by flash column  
156 chromatography (silica gel eluted with 20% EtOAc in hexanes) to give *ent*-steroid **10**  
157 (594 mg, 90%): <sup>1</sup>H NMR (400 MHz, CDCl<sub>3</sub>) δ 5.34-5.33 (m, 1H), 4.67 (s, 2H), 4.14-4.08  
158 (m, 2H), 3.94-3.86 (m, 4H), 3.42-3.38 (m, 1H), 3.36 (s, 3H), 2.32-0.90 (m), 0.99 (s, 3H),  
159 0.70 (s, 3H); <sup>13</sup>C NMR (100 MHz, CDCl<sub>3</sub>) δ 176.1, 140.7, 121.5, 109.9, 94.7, 76.9, 64.6,

160 64.5, 59.7, 56.0, 55.1, 52.6, 50.1, 47.3, 41.9, 39.5, 38.9, 37.4, 37.2, 36.7, 32.2, 31.8,  
161 31.7, 28.9, 27.0, 23.8, 23.7, 21.8, 20.8, 19.3, 14.2, 12.0.

162

163 ***ent*-Steroid 11**

164

165 To a solution of *ent*-steroid **10** (594 mg, 1.12 mmol) in diethyl ether (20 mL) was added  
166 LiAlH<sub>4</sub> (2.0 M in THF, 4.0 mL, 8.0 mmol) at room temperature. After 2 h, water (0.32  
167 mL), 10 % aqueous NaOH (0.64 mL) and water (0.96 mL) were slowly added  
168 sequentially. After stirring for 30 min, the mixture was filtered through Celite and washed  
169 with CH<sub>2</sub>Cl<sub>2</sub> (100 mL). Solvent was removed under reduced pressure and the residue  
170 was purified by flash column chromatography (silica gel eluted with 25% EtOAc in  
171 hexanes) to give *ent*-steroid **11** (530 mg, 97%): <sup>1</sup>H NMR (400 MHz, CDCl<sub>3</sub>) δ 5.31-5.30  
172 (m, 1H), 4.63 (s, 2H), 3.92-3.85 (m, 4H), 3.70-3.33 (m, 3H), 3.31 (s, 3H), 2.32-0.76 (m),  
173 0.96 (s, 3H), 0.65 (s, 3H); <sup>13</sup>C NMR (100 MHz, CDCl<sub>3</sub>) δ 140.5, 121.5, 110.0, 94.5, 77.3,  
174 64.4, 62.3, 56.5, 55.0, 50.1, 50.0, 42.2, 41.9, 39.4, 39.3, 39.0, 37.1, 36.6, 31.7, 29.3,  
175 28.8, 27.5, 24.0, 23.6, 20.9, 20.5, 19.2, 12.0.

176

177 ***ent*-Steroid 12**

178

179 To a solution of *ent*-steroid **11** (530 mg, 1.08 mmol) in CH<sub>2</sub>Cl<sub>2</sub> (15 mL) was added mesyl  
180 chloride (2 mmol, 0.15 mL) and Et<sub>3</sub>N (0.42 mL, 3 mmol) at 0 °C. After 1 h, aqueous  
181 NH<sub>4</sub>Cl was added and the product was extracted into CH<sub>2</sub>Cl<sub>2</sub> (100 mL x 2). The  
182 combined extracts were dried over anhydrous Na<sub>2</sub>SO<sub>4</sub>, filtered and the solvents



183 removed under reduced pressure. The residue was purified by flash column  
184 chromatography (silica gel eluted with 10% EtOAc in hexanes) to give *ent*-steroid **12**  
185 (625 mg, 99%):  $^1\text{H}$  NMR (400 MHz,  $\text{CDCl}_3$ )  $\delta$  5.34-5.33 (m 1H), 4.67 (s, 2H), 4.37-4.08  
186 (m, 3H), 3.95-3.88 (m, 4H), 3.43-3.38 (m, 1H), 3.35 (s, 3H), 2.99 (s, 3H), 2.35-0.79 (m,  
187 30H), 0.99 (s, 3H), 0.69 (s, 3H);  $^{13}\text{C}$  NMR (100 MHz,  $\text{CDCl}_3$ )  $\delta$  140.7, 121.5, 109.8,  
188 94.6, 76.8, 70.0, 64.5, 56.4, 55.1, 49.9, 42.1, 39.7, 39.5, 39.3, 39.0, 37.2, 37.1, 36.6,  
189 31.8, 31.7, 29.4, 28.8, 27.4, 24.0, 23.7, 21.0, 20.1, 19.3, 12.2.

190

191 ***ent*-Steroid 13**

192

193 To a solution of *ent*-steroid **12** (625 mg, 1.08 mmol) in diethyl ether (30 mL) was added  
194  $\text{LiAlH}_4$  (2.0 M in THF, 4.0 mL, 8.0 mmol) at room temperature. After 2 h, water (0.32  
195 mL), 10 % aqueous NaOH (0.64 mL) and water (0.96 mL) were slowly added  
196 sequentially. After stirring for 30 min, the mixture was filtered through Celite and washed  
197 with  $\text{CH}_2\text{Cl}_2$  (100 mL). Solvent was removed under reduced pressure and the residue  
198 was purified by flash column chromatography (silica gel eluted with 10% EtOAc in  
199 hexanes) to give *ent*-steroid **13** (510 mg, 99%):  $^1\text{H}$  NMR (400 MHz,  $\text{CDCl}_3$ )  $\delta$  5.32-5.31  
200 (m, 1H), 4.65 (s, 2H), 3.90-3.37 (m, 4H), 3.40-3.36 (m, 1H), 3.33 (s, 3H), 2.33-0.86 (m),  
201 0.98 (s, 3H), 0.64 (s, 3H);  $^{13}\text{C}$  NMR (100 MHz,  $\text{CDCl}_3$ )  $\delta$  140.6, 121.6, 110.1, 94.6, 76.7,  
202 64.5, 64.4, 56.6, 56.0, 55.0, 50.0, 42.2, 39.7, 39.6, 39.5, 37.1, 36.6, 36.0, 35.6, 31.8,  
203 31.7, 28.8, 28.1, 24.2, 23.6, 20.9, 20.5, 19.3, 18.6, 11.7.

204

205 ***ent*-Steroid 14**

206

207 To a solution of *ent*-steroid **13** (270 mg, 0.57 mmol) in acetone (30 mL) was added *p*-  
208 toluenesulfonic acid (100 mg) at room temperature. The reaction was stirred at room  
209 temperature for 2 h. Acetone was removed under reduced pressure and the residue  
210 was purified by flash column chromatography (silica gel eluted with 15% EtOAc in  
211 hexanes) to give *ent*-steroid **14** (235 mg, 96%); <sup>1</sup>H NMR (400 MHz, CDCl<sub>3</sub>) δ 5.29-5.27  
212 (m, 1H), 4.62 (s, 2H), 3.37-3.33 (m, 1H), 3.37-3.33 (m, 1H), 3.30 (s, 3H), 2.35-0.83 (m),  
213 2.07 (s, 3H), 0.95 (s, 3H), 0.62 (s, 3H); <sup>13</sup>C NMR (100 MHz, CDCl<sub>3</sub>) δ 208.9, 140.5,  
214 121.5, 94.5, 76.8, 56.6, 55.7, 55.0, 50.0, 44.0, 42.2, 39.6, 39.4, 37.1, 36.5, 35.5, 35.3,  
215 31.7, 31.7, 29.7, 28.8, 28.0, 24.1, 20.9, 20.2, 19.2, 18.4, 11.7.

216

**217 *ent*-Steroid 15**

218

219 To a solution of *ent*-steroid **14** (235 mg, 0.55 mmol) in THF (20 mL) was added 6 N HCl  
220 (10 mL) at room temperature. After 2 h, the product was extracted into CH<sub>2</sub>Cl<sub>2</sub> (100 mL  
221 x 2) and the combined extracts were washed with aqueous NaHCO<sub>3</sub> (50 ml x 2), dried  
222 over Na<sub>2</sub>SO<sub>4</sub> and filtered. Solvent was removed under reduced pressure and the  
223 residue was purified by flash column chromatography (silica gel eluted with 25% EtOAc  
224 in hexanes) to give *ent*-steroid **15** (208 mg, 98%): <sup>1</sup>H NMR (400 MHz, CDCl<sub>3</sub>) δ 5.35-  
225 5.34 (m, 1H), 3.55-3.48 (m, 1H), 2.39-0.89 (m), 2.13 (s, 3H), 1.01 (s, 3H), 0.68 (s, 3H);  
226 <sup>13</sup>C NMR (100 MHz, CDCl<sub>3</sub>) δ 309.4, 140.8, 121.6, 71.7, 56.7, 55.8, 50.1, 44.2, 42.3,  
227 42.2, 39.7, 37.2, 36.5, 35.6, 35.4, 31.9(2C), 31.6, 29.8, 28.2, 24.2, 21.0, 20.4, 19.4,  
228 18.6, 11.8.

229

230 ***ent*-Steroid 16 (*ent*-VP1-001)**

231

232 To a solution of *ent*-steroid **15** (208 mg, 0.54 mmol) in benzene (6 mL) and diethyl ether

233 (10 mL) was added methyl lithium (1.6 M in diethyl ether, 2 mL, 3.2 mmol) at 0 °C. After

234 1 h, aqueous NH<sub>4</sub>Cl was added and the product was extracted into EtOAc (100 mL x 2),235 dried over Na<sub>2</sub>SO<sub>4</sub> and filtered. Solvent was removed under reduced pressure and the

236 residue was purified by flash column chromatography (silica gel eluted with 25% EtOAc

237 in hexanes) to give *ent*-steroid **16 (*ent*-VP1-001)** (147 mg, 68%): mp 181-183 °C; [ $\alpha$ ]<sub>D</sub><sup>20</sup>238 +38.3 (*c* = 0.06, CHCl<sub>3</sub>); <sup>1</sup>H NMR (400 MHz, CDCl<sub>3</sub>)  $\delta$  5.36-5.35 (m, 1H), 3.56-3.50 (m,239 1H), 2.31-0.93 (m), 0.95 (s, 3H), 0.69 (s, 3H); <sup>13</sup>C NMR (100 MHz, CDCl<sub>3</sub>)  $\delta$  140.8,

240 121.7, 71.8, 71.1, 56.7, 56.1, 50.1, 44.4, 42.3, 42.2, 39.8, 37.2, 36.5, 36.4, 35.7,

241 31.9(2C), 31.6, 29.3, 29.2, 28.2, 24.2, 21.1, 20.7, 19.4, 18.7, 11.8.

242

243

244
