# Supplementary material for: Mechanism of Action of VP1-001 in cryAB(R120G)-Associated and Age-Related Cataracts
Source: PubMed Central journal article supplement — Invest Ophthalmol Vis Sci. 2019 Aug;60(10):3320–31. doi: 10.1167/iovs.18-25647 (PMC6676924; doi:10.1167/iovs.18-25647), 2019-08
Supplement: iovs-60-07-63_s03.pdf [file iovs-60-07-63_s03.pdf]

## SUPPLEMENTAL FIGURE 2

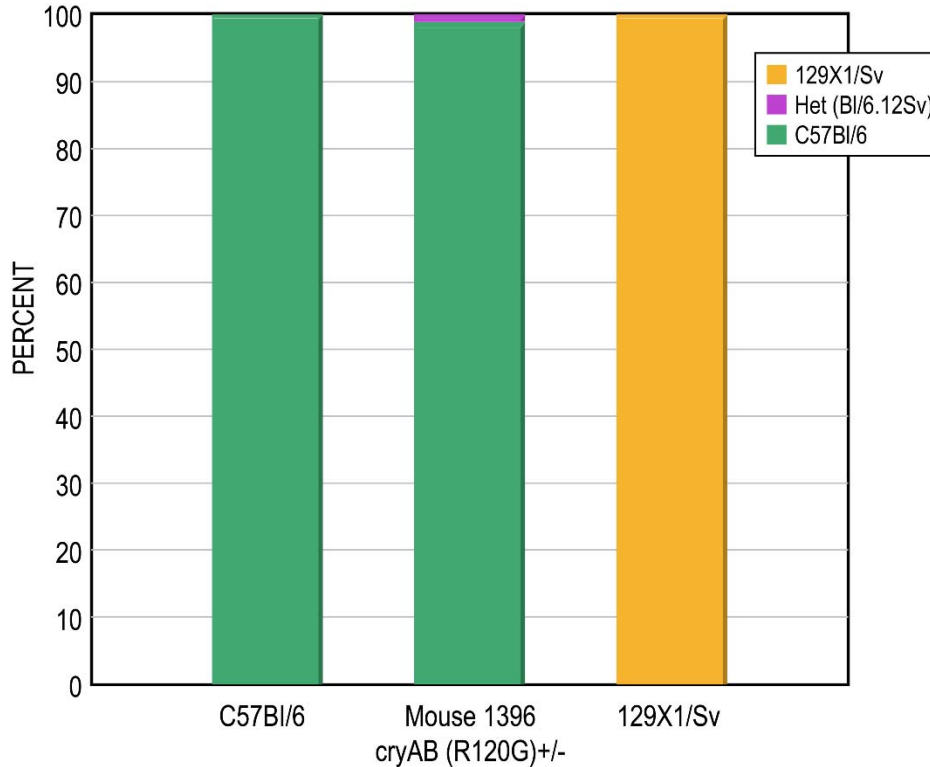

**Supplemental Figure 2. Percent of genetic material genotyping as C57BL/6 in cryAB R120G +/- mice.** Mouse genomes were analyzed by SNP analysis (DartMouse). Controls included a Jackson Labs C57BL/6 mouse control (green) and a 129Sv mouse control (orange) run with this analysis. Percent of mixed C57BL/6 and 129Sv background is shown in purple. A representative mouse from the cryAB R120G +/- mouse colony (mouse #1396) was found to have 98.68% genetic material from C57BL/6 strain.
