# Supplementary material for: Mechanism of Action of VP1-001 in cryAB(R120G)-Associated and Age-Related Cataracts
Source: PubMed Central journal article supplement — Invest Ophthalmol Vis Sci. 2019 Aug;60(10):3320–31. doi: 10.1167/iovs.18-25647 (PMC6676924; doi:10.1167/iovs.18-25647), 2019-08
Supplement: iovs-60-07-63_s04.pdf [file iovs-60-07-63_s04.pdf]

SUPPLEMENTAL FIGURE 3

Wild type lens epithelium (untreated)

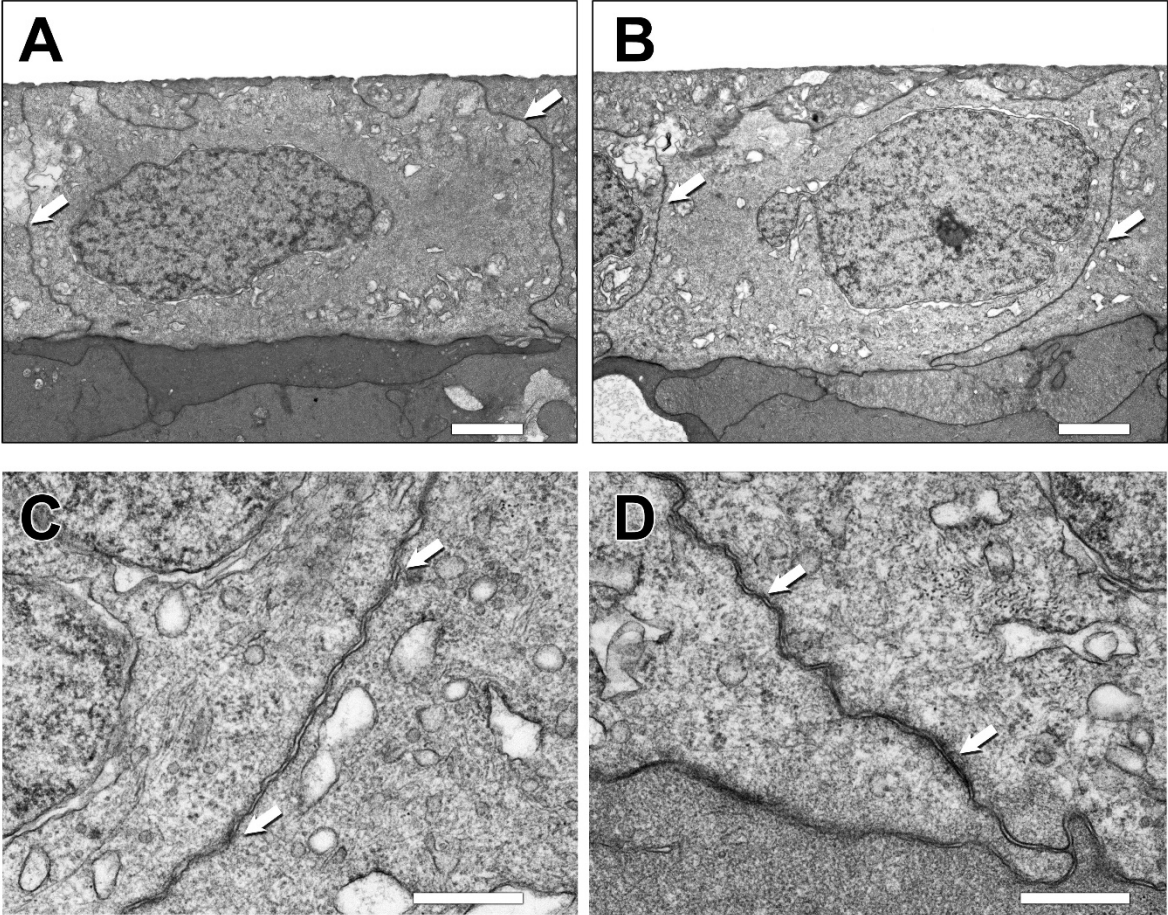

Wild type lens fiber cells (untreated)

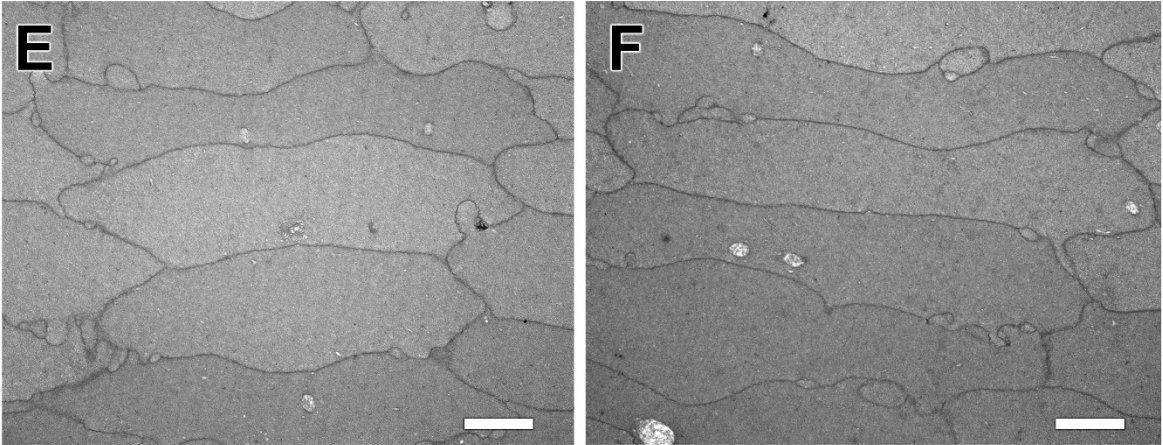

**Supplemental Figure 3.** (related to Figure 9). Representative electron micrographs from an untreated, WT mouse. Lens epithelium at low magnification for (A, B) 196-day-old mouse lens, as well as for higher magnification (C, D). The cell-cell contacts appear to be normal and did not display any gaps at low or high magnification. Representative electron micrographs of lens fiber cells (E, F) for a 196-day-old mouse lens. Fiber cell packing has canonical hexagonal packing. *Scale bars, 2  $\mu\text{m}$ , white (A, B, E, F); Scale bars, 0.5  $\mu\text{m}$ , white.*
