# Supplementary figures and images for: Mechanism of Action of VP1-001 in cryAB(R120G)-Associated and Age-Related Cataracts
Source: PubMed Central journal article supplement — Invest Ophthalmol Vis Sci. 2019 Aug;60(10):3320–31. doi: 10.1167/iovs.18-25647 (PMC6676924; doi:10.1167/iovs.18-25647), 2019-08

# SUPPLEMENTAL FIGURE 1

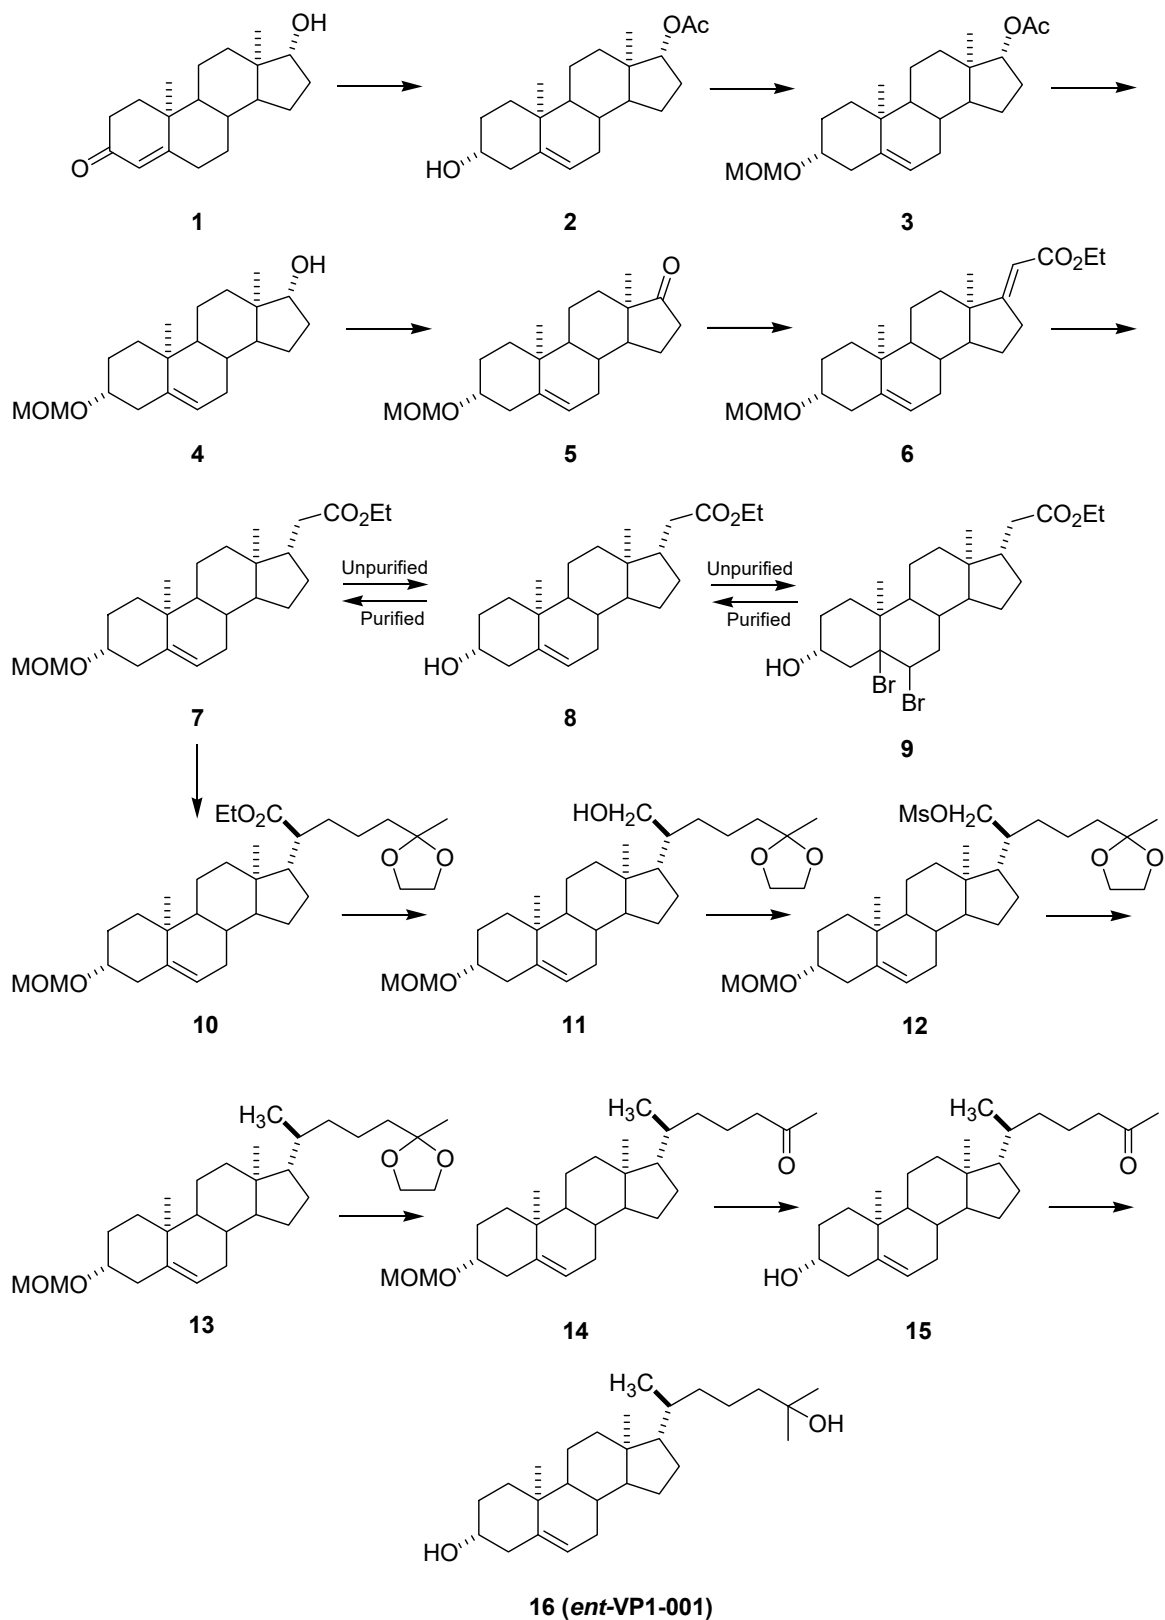

**Supplemental Figure 1. Synthesis of *ent*-VP1-001.**

Supplement: iovs-60-07-63_s02.pdf [file iovs-60-07-63_s02.pdf]
